# Supplementary material for: Two Functionally Distinctive Phosphopantetheinyl Transferases from Amoeba Dictyostelium discoideum
Source: PLOS journal article supplement (doi:10.1371/journal.pone.0024262), 2011-09-12
Supplement: S4 (10.1371/journal.pone.0024262.s004) [file journal.pone.0024262.s004]

Figure S4. MALDI-TOF Identification of DiAcpS and DiSfp

### DiAcpS

### DiSfp

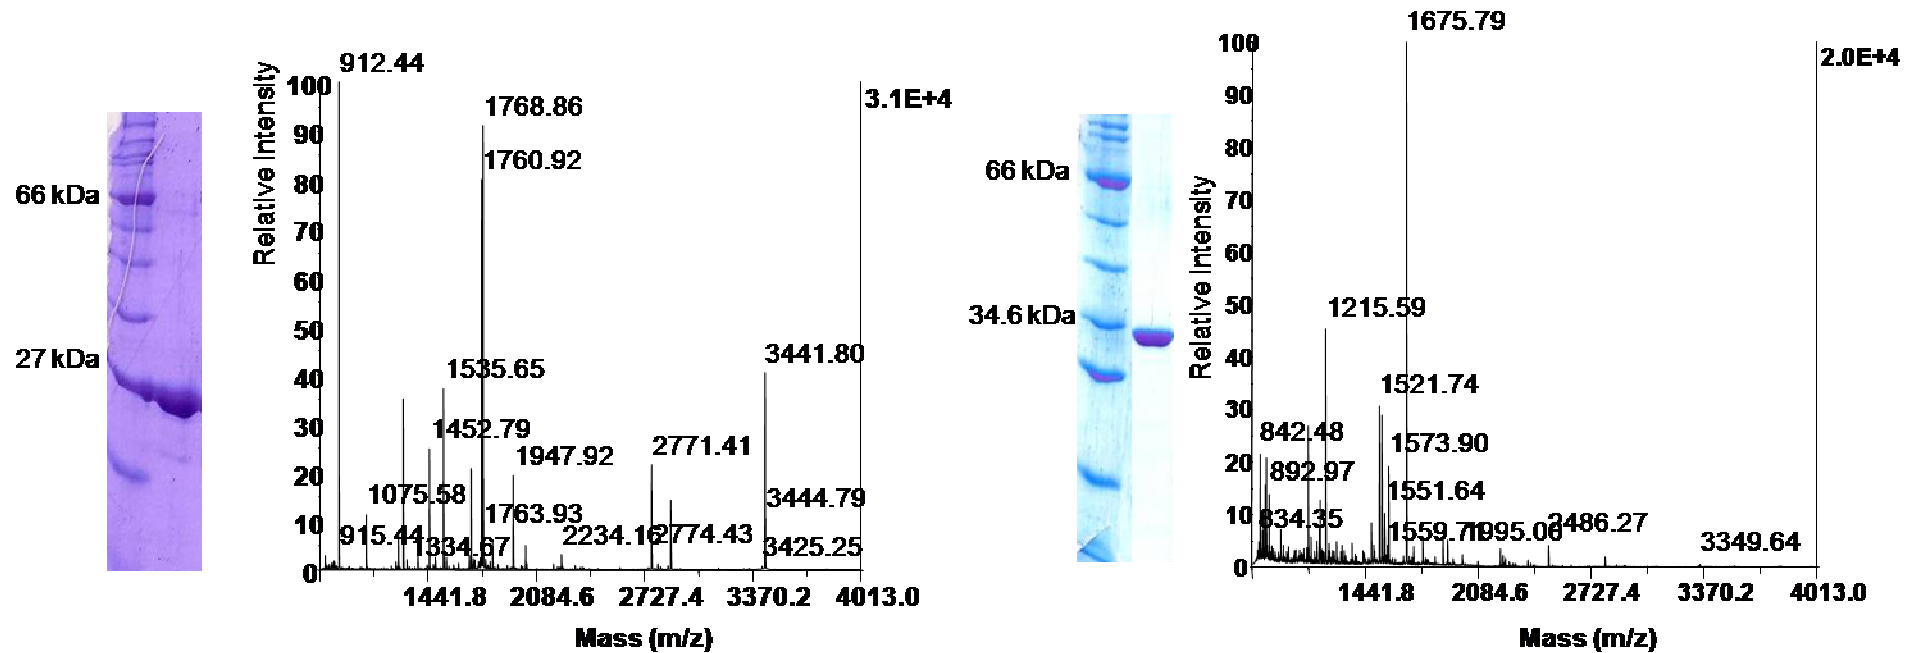

| Observed  | Mr(expt)  | Sequence                   |
|-----------|-----------|----------------------------|
| 1075.5848 | 1074.5775 | IFGIGNDIVK                 |
| 1452.7892 | 1451.7819 | RAFNEVEISIFK               |
| 1296.6556 | 1295.6483 | AFNEVEISIFK                |
| 912.4500  | 911.4427  | GFEYLAGR                   |
| 2770.4155 | 2769.4082 | IHLAISHDTDYAISNVILESNESTK  |
| 2884.4653 | 2883.4580 | IHLAISHDTDYAISNVILESNESTKN |

| Observed  | Mr(expt)  | Sequence             |
|-----------|-----------|----------------------|
| 1573.8937 | 1572.8864 | ELVNILLGFDISK        |
| 1215.5841 | 1214.5768 | WKPNDIEW             |
| 1675.7883 | 1674.7810 | EINDFINDPIESNR       |
| 875.4268  | 874.4195  | DGSWLIGK             |
| 1115.6377 | 1114.6304 | RLMIELVNIK           |
| 959.5199  | 958.5126  | LMIELVNIK            |
| 1183.5736 | 1182.5663 | MLSLDYNSIK           |
| 1883.9542 | 1882.9469 | TQSNKPYLSTTTTISNK    |
| 2261.8762 | 2260.8689 | MSEFFDTMSSCFTDNEWK   |
| 1434.7411 | 1433.7338 | IDLFFIHWCLK          |
| 2485.2598 | 2484.2525 | SFEFIIDQTNQTAQIFLNDK |
| 1909.9816 | 1908.9743 | SILNNYQFTYFKPFK      |
| 1521.7537 | 1520.7464 | DNLSIQILESDFK        |
