# Supplementary material for: Two Functionally Distinctive Phosphopantetheinyl Transferases from Amoeba Dictyostelium discoideum
Source: PLOS journal article supplement (doi:10.1371/journal.pone.0024262), 2011-09-12
Supplement: S6 (10.1371/journal.pone.0024262.s006) [file journal.pone.0024262.s006]

Figure S6. MALDI-TOF identification of DiACP

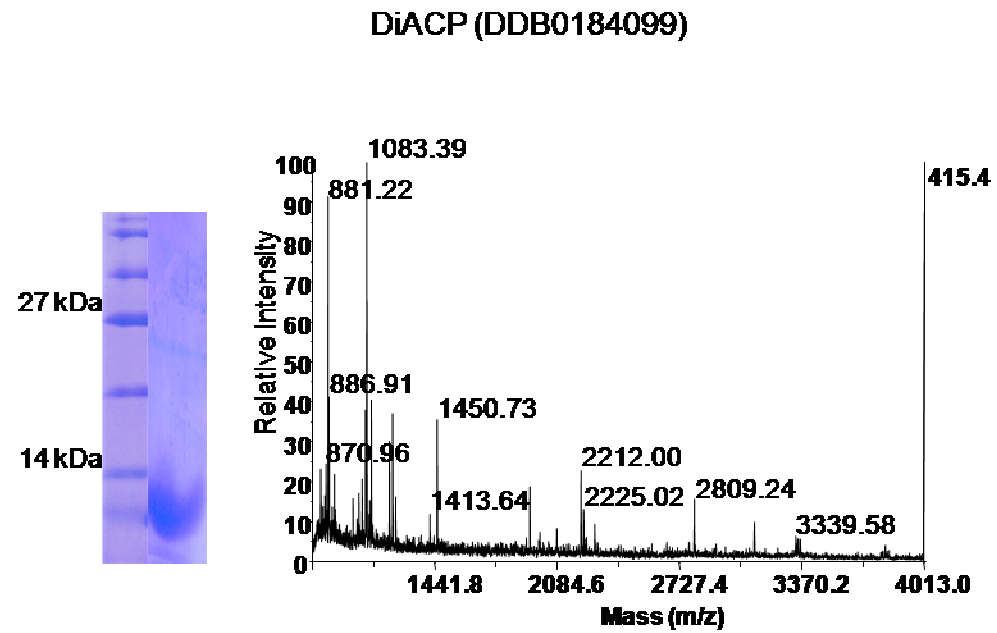

| Observed | Mr(expt) | Sequence |
|----------|----------|----------|
|----------|----------|----------|

|           |           |              |
|-----------|-----------|--------------|
| 1234.5234 | 1233.5161 | QPIVASSIMMYR |
|-----------|-----------|--------------|

|           |           |            |
|-----------|-----------|------------|
| 1107.5453 | 1106.5380 | VIGVVSQYDK |
|-----------|-----------|------------|

|           |           |                                 |
|-----------|-----------|---------------------------------|
| 3360.3638 | 3359.3565 | ELGLDSLDSADILVAVVEEFGIEIPDEEADK |
|-----------|-----------|---------------------------------|

|           |           |              |
|-----------|-----------|--------------|
| 1413.6345 | 1412.6272 | ITSCAETISYLR |
|-----------|-----------|--------------|
